# Supplementary material
Source: HighWire-hosted journal article supplement (https://www.life-science-alliance.org/content/5/12/e202101284/F9)
Supplement: inline-supplementary-material-5 [file inline-supplementary-material-5.pdf]

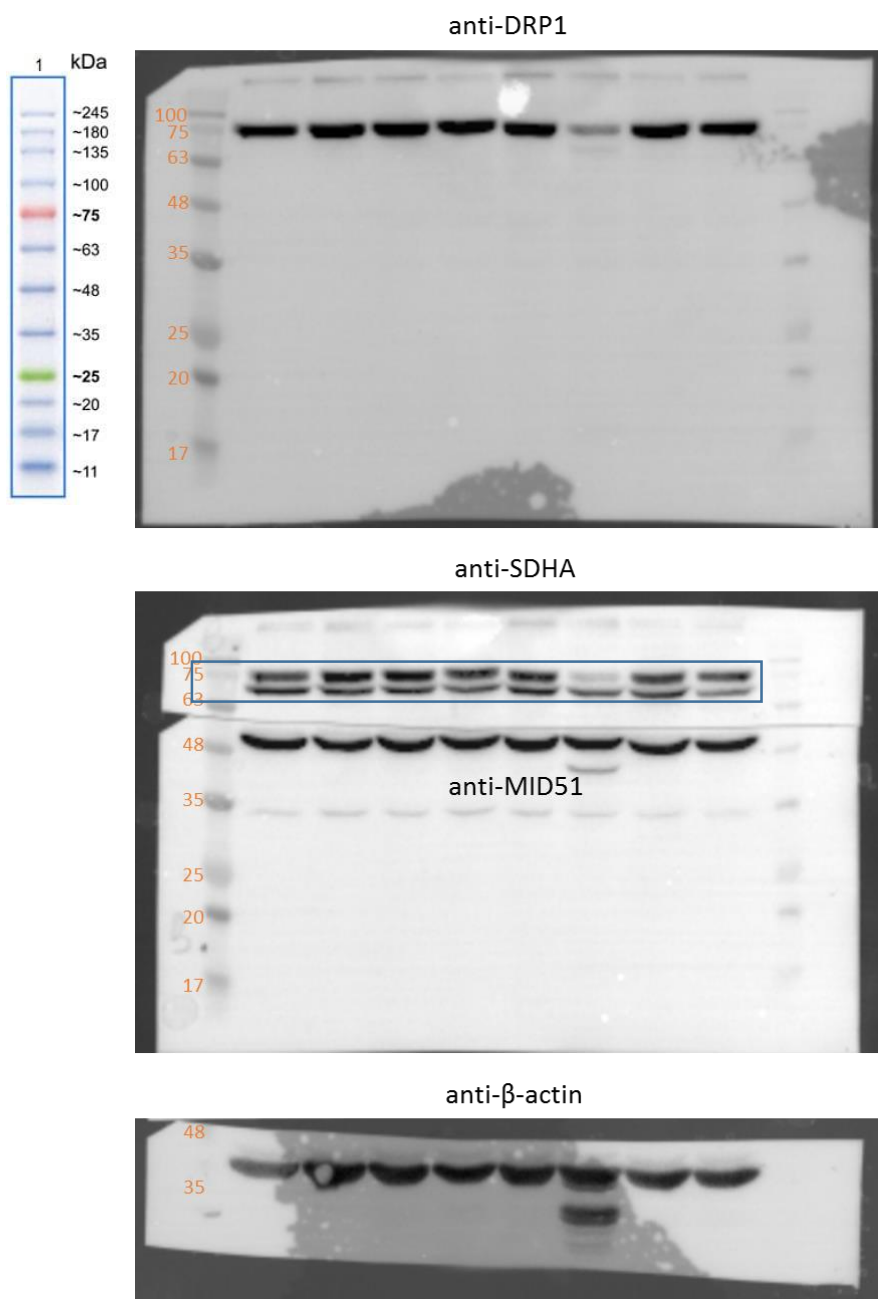

**Figure S2. Steady-state levels of fission machinery proteins in DNM1L patient fibroblasts**

### anti-OXPHOS cocktail

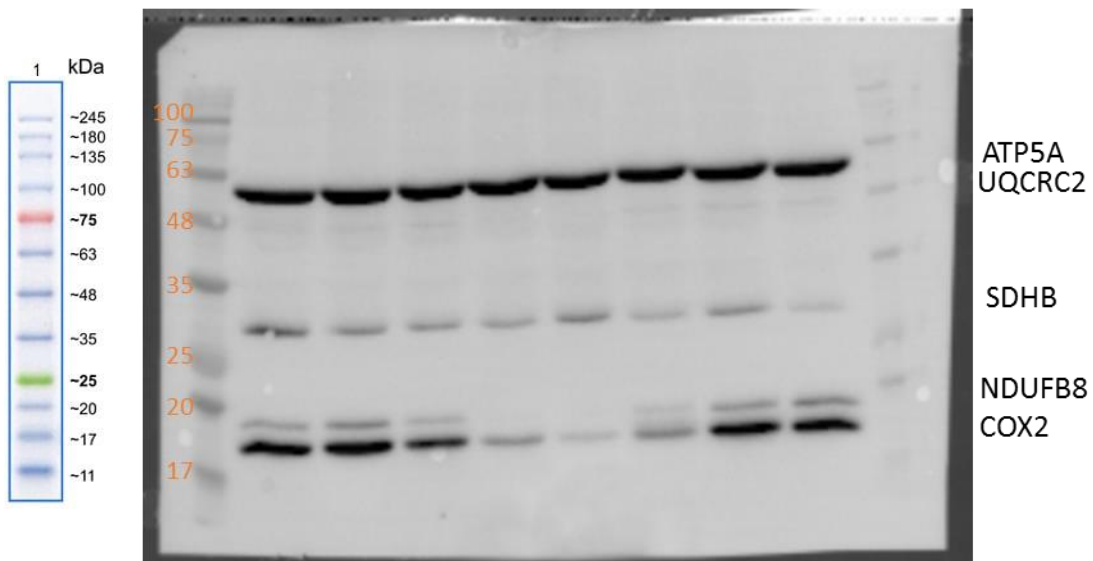

### anti-SDHA

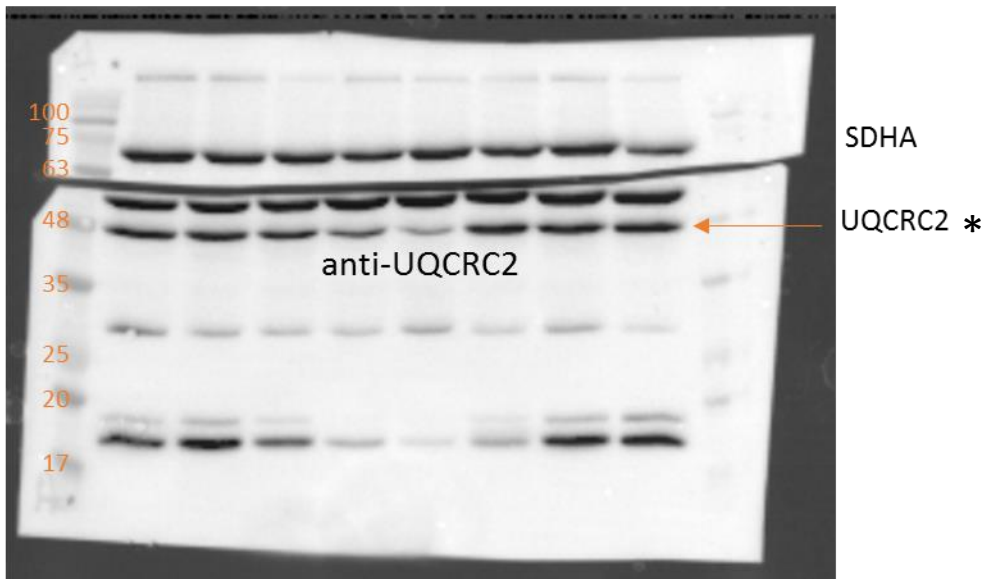

### anti-GAPDH

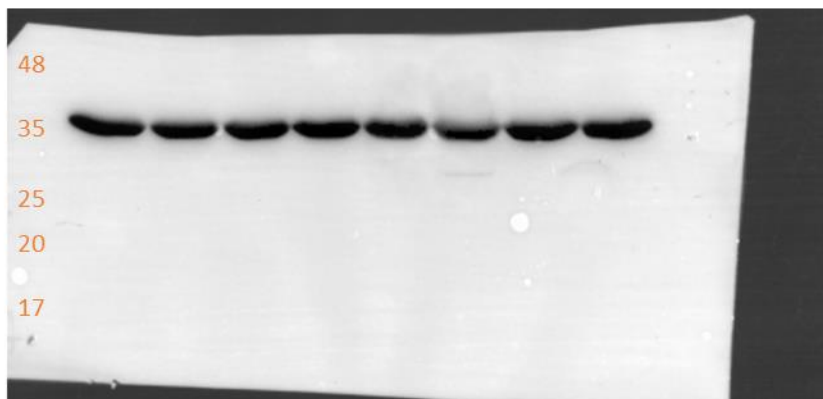

**Figure S5. DNMI1L patient fibroblasts demonstrate OXPHOS deficiencies.**

\*anti-UQCRC2 applied separately o/n 1:1000 dilution

anti-DRP1

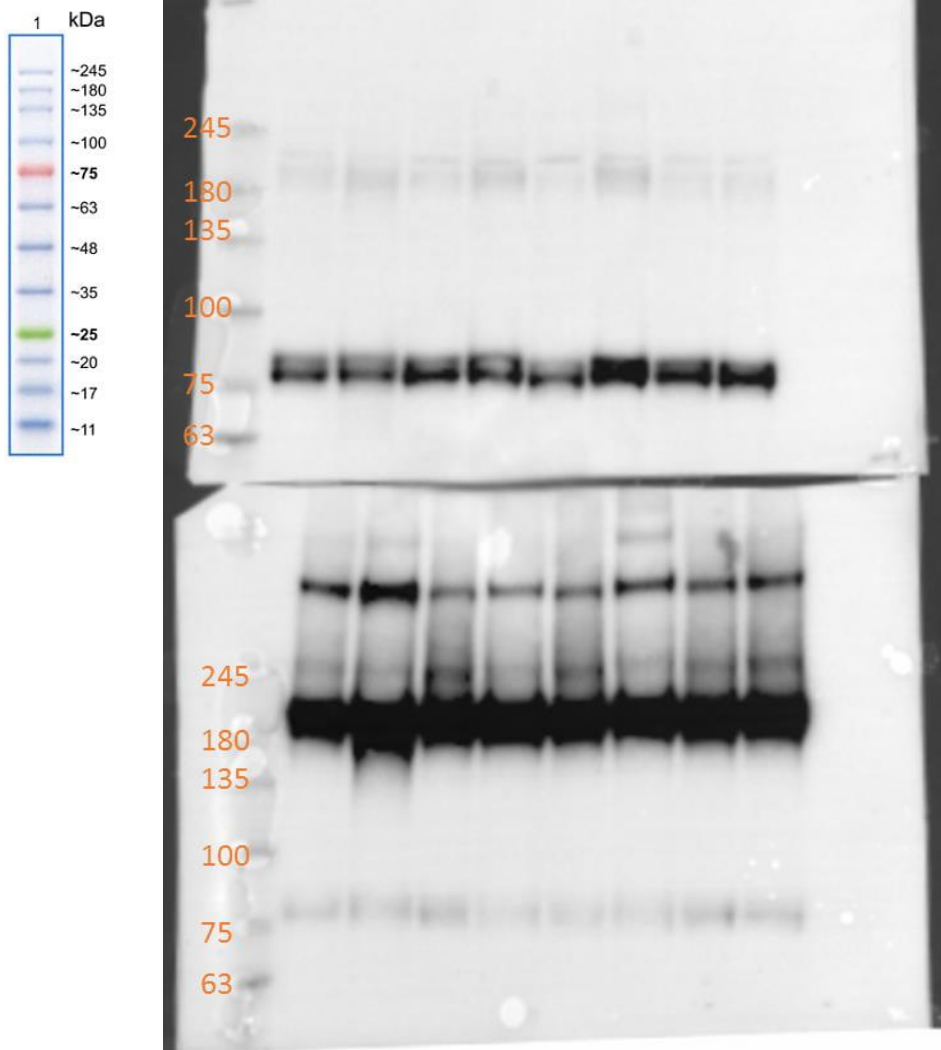

**Figure S7. Analysis of DRP1 oligomers in DNM1L patient fibroblasts.**

anti-DRP1

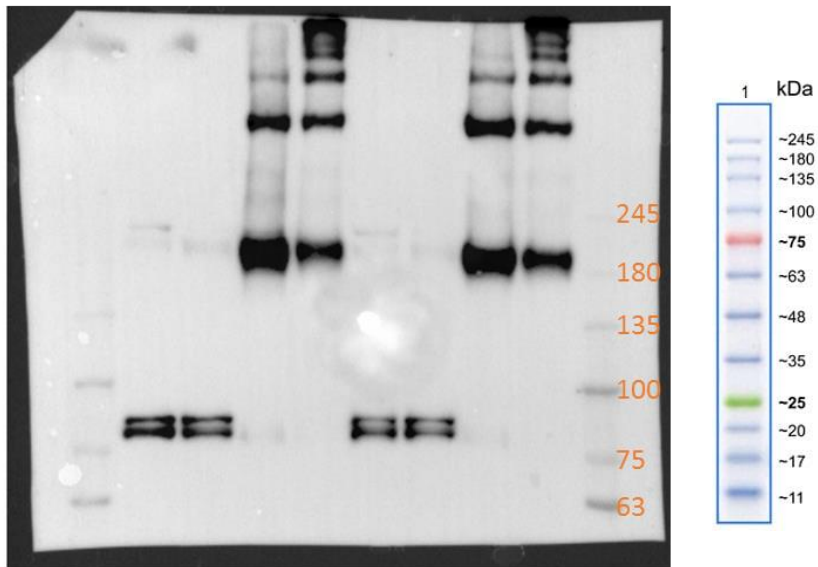

anti-SDHA

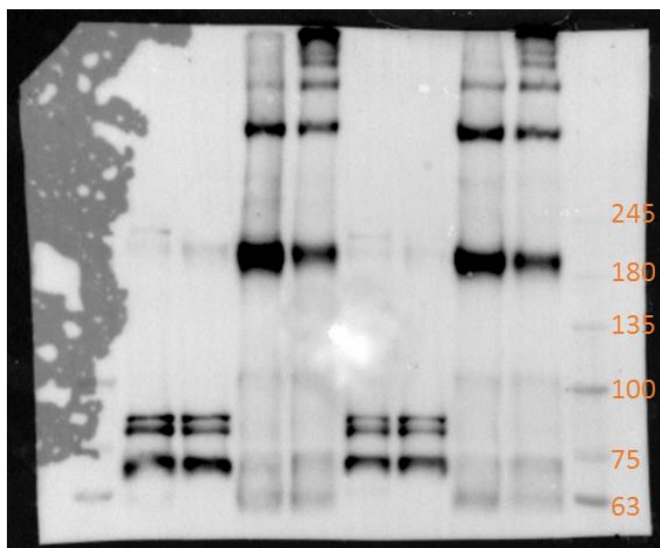

anti-HSP60

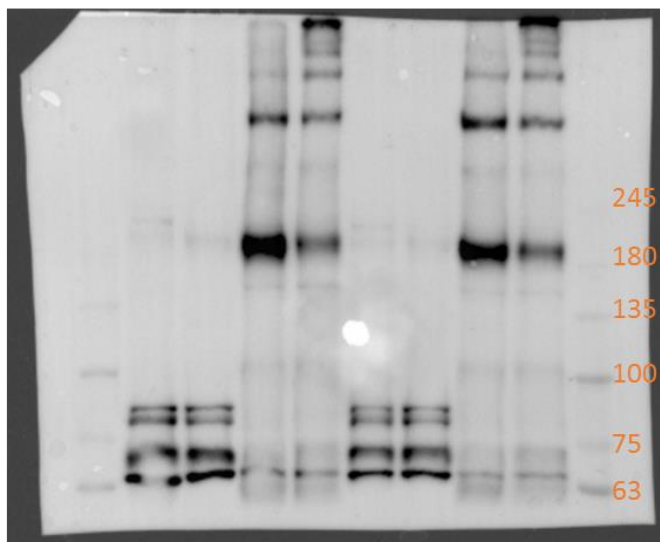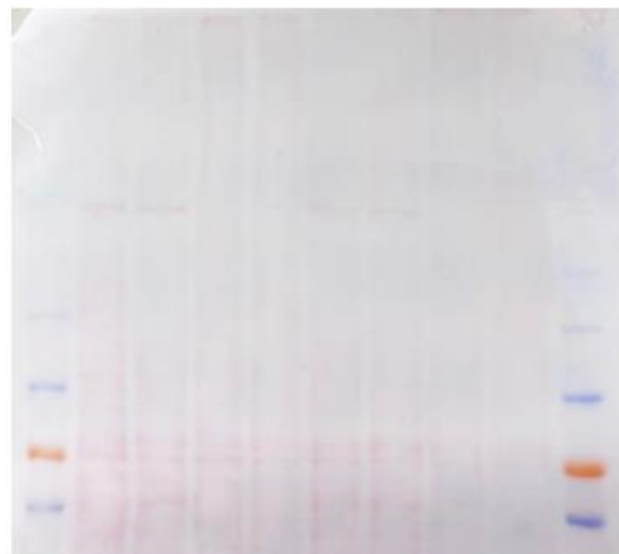

Ponceau staining

**Figure S7. Analysis of DRP1 oligomers in DNM1L patient fibroblasts.**
